# Supplementary material for: Efficacy of infliximab treatment on the mucosal healing of different intestinal segments in patients with ileocolonic Crohn’s disease
Source: PubMed Central journal article supplement — Ther Adv Gastroenterol. 2020 Dec 21;13:1756284820976923. doi: 10.1177/1756284820976923 (PMC7758567; doi:10.1177/1756284820976923), 2020-12-21
Supplement: sj-pdf-1-tag-10.1177_1756284820976923.pdf [file sj-pdf-1-tag-10.1177_1756284820976923.pdf]

**Supplemental Table 1.** The relationship between the degree of improvement in each colonic area and long-term outcome.

| Segments                | Clinical remission (n) | Endoscopic remission (n) | Disease progression (n) |
|-------------------------|------------------------|--------------------------|-------------------------|
| <b>Right colon</b>      |                        |                          |                         |
| CMH                     | 19                     | 5                        | 3                       |
| PMH                     | 19                     | 6                        | 5                       |
| NMH                     | 21                     | 6                        | 6                       |
| Kendall's tau-b value   | -0.084                 | -0.022                   | 0.093                   |
| <i>P</i>                | 0.454                  | 0.88                     | 0.483                   |
| <b>Transverse colon</b> |                        |                          |                         |
| CMH                     | 43                     | 11                       | 12                      |
| PMH                     | 13                     | 4                        | 1                       |
| NMH                     | 3                      | 1                        | 1                       |
| Kendall's tau-b value   | -0.145                 | -0.151                   | 0.115                   |
| <i>P</i>                | 0.216                  | 0.32                     | 0.4                     |
| <b>Left colon</b>       |                        |                          |                         |
| CMH                     | 37                     | 12                       | 7                       |
| PMH                     | 15                     | 3                        | 3                       |
| NMH                     | 7                      | 1                        | 5                       |
| Kendall's tau-b value   | 0.088                  | 0.185                    | -0.226                  |
| <i>P</i>                | 0.438                  | 0.217                    | 0.09                    |
| <b>Rectum</b>           |                        |                          |                         |
| CMH                     | 41                     | 13                       | 5                       |
| PMH                     | 5                      | 0                        | 5                       |
| NMH                     | 13                     | 3                        | 5                       |
| Kendall's tau-b value   | 0.097                  | 0.153                    | -0.341                  |
| <i>P</i>                | 0.398                  | 0.309                    | 0.011                   |

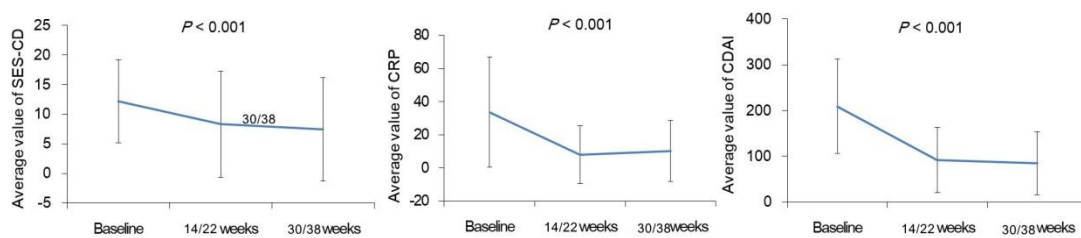

Supplemental Figure 1. Changes from baseline to 30/38 weeks in total SES-CD, CRP and CDAI in patients with CD.
